# Supplementary material for: A facile approach for the fabrication of core–shell PEDOT nanofiber mats with superior mechanical properties and biocompatibility
Source: Royal Society of Chemistry journal article supplement (doi:10.1039/c3tb00448a), 2013-01-01
Supplement: c3tb00448a.pdf [file c3tb00448a.pdf]

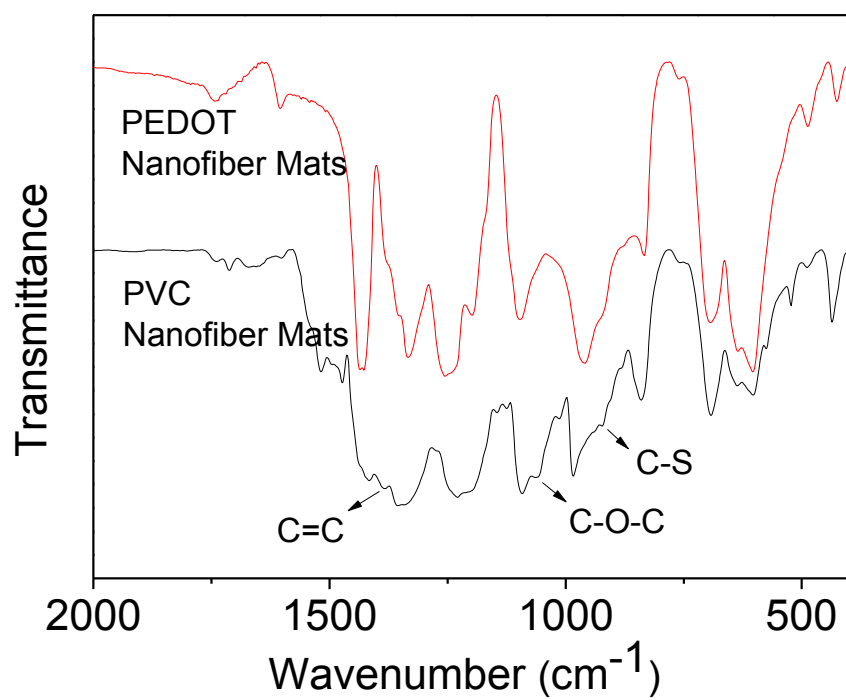

**Figure S1.** FTIR spectra of PVC nanofiber mats and PEDOT nanofiber mats.

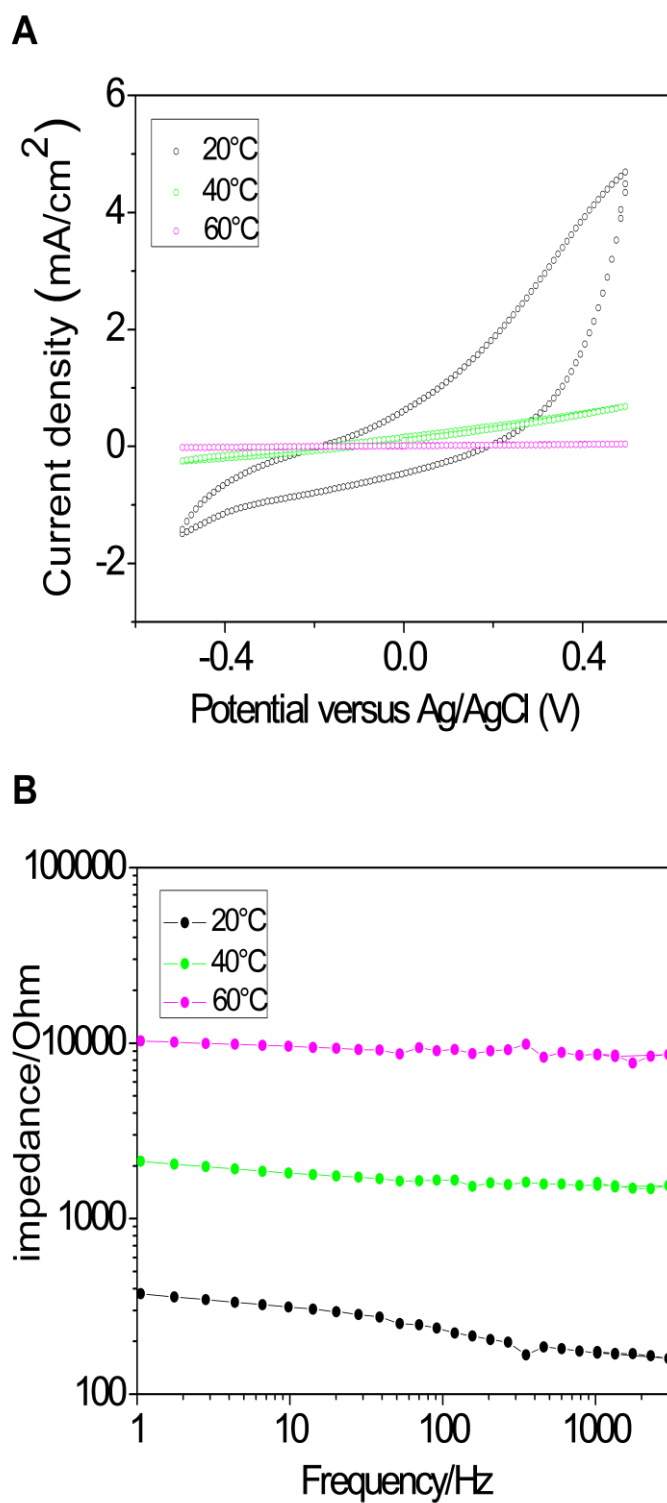

**Figure S2.** (A) Cyclic voltammety and (B) electrochemical impedance spectrum of PEDOT nanofiber mats obtained under different polymerization temperatures.
